# Supplementary material for: Novel Myopia Genes and Pathways Identified From Syndromic Forms of Myopia
Source: PubMed Central journal article supplement (PMC5773233; doi:10.1167/iovs.17-22173), 2018-01
Supplement: iovs-58-14-16_s01.pdf [file iovs-58-14-16_s01.pdf]

## Supplementary Table 1

Summary of all unique genes associated with refractive errors of all types (ametropia) that were identified from OMIM

| <b>Approved Gene ID</b> | <b>Alternative Gene Descriptors</b>       | <b>Omim Gene Number</b> | <b>Ensembl ID</b> | <b>Linkage</b> |
|-------------------------|-------------------------------------------|-------------------------|-------------------|----------------|
| ABCC6                   | ABCC6, ARA, ABC34, MLP1, PXE, GACI2       | 603234                  | ENSG00000091262   | 16p13.11       |
| ADAMTS10                | ADAMTS10, WMS1                            | 608990                  | ENSG00000142303   | 19p13.2        |
| ADAMTS17                | ADAMTS17                                  | 607511                  | ENSG00000140470   | 15q26.3        |
| ADAMTS18                | ADAMTS18, MMCAT                           | 607512                  | ENSG00000140873   | 16q23.1        |
| ADAMTS2                 | ADAMTS2, NPI                              | 604539                  | ENSG00000087116   | 5q35.3         |
| ADAMTSL4                | ADAMTSL4, TSRC1, ECTOL2                   | 610113                  | ENSG00000143382   | 1q21.3         |
| ADNP                    | ADNP, ADNP1, KIAA0784, HVDAS, MRD28       | 611386                  | ENSG00000101126   | 20q13.13       |
| AGK                     | AGK, MULK, MTDPS10, CATC5, CTRCT38        | 610345                  | ENSG00000006530   | 7q34           |
| ALDH18A1                | ALDH18A1, PYCS, GSAS, ARCL3A              | 138250                  | ENSG00000059573   | 10q24.1        |
| ASXL1                   | ASXL1, KIAA0978, BOPS, MDS                | 612990                  | ENSG00000171456   | 20q11.21       |
| ATP6V0A2                | ATP6V0A2, WSS, ARCL2A                     | 611716                  | ENSG00000185344   | 12q24.31       |
| B3GALNT2                | B3GALNT2, MGC39558, MDDGA11               | 610194                  | ENSG00000162885   | 1q42.3         |
| B3GALT6                 | B3GALT6, SEMDJL1, EDSP2                   | 615291                  | ENSG00000176022   | 1p36.33        |
| B3GAT3                  | B3GAT3, GLCATI                            | 606374                  | ENSG00000149541   | 11q12.3        |
| B3GLCT                  | B3GALTL, B3GTL, B3GLCT                    | 610308                  | ENSG00000187676   | 13q12.3        |
| BFSP2                   | BFSP2, CP49, CP47, CTRCT12                | 603212                  | ENSG00000170819   | 3q22.1         |
| BRAF                    | BRAF, NS7                                 | 164757                  | ENSG00000157764   | 7q34           |
| C12orf57                | C12orf57, C10, TEMTYS                     | 615140                  | ENSG00000111678   | 12p13.31       |
| CACNA1F                 | CACNA1F, CSNB2, CORDX3, CSNB2A, AIED, OA2 | 300110                  | ENSG00000102001   | Xp11.23        |
| CANT1                   | CANT1, SCAN1, DBQD                        | 613165                  | ENSG00000171302   | 17q25.3        |
| CBS                     | CBS                                       | 613381                  | ENSG00000274276   | 21q22.3        |
| CC2D2A                  | CC2D2A, KIAA1345, MKS6                    | 612013                  | ENSG00000048342   | 4p15.32        |

|         |                                                 |        |                 |          |
|---------|-------------------------------------------------|--------|-----------------|----------|
| CHMP1A  | CHMP1A, PCOLN3, PRSM1, PCH8                     | 164010 | ENSG00000131165 | 16q24.3  |
| CHRDL1  | CHRDL1, VOPT, MGC1                              | 300350 | ENSG00000101938 | Xq23     |
| CHST14  | CHST14, D4ST1, ATCS, EDSMC1                     | 608429 | ENSG00000169105 | 15q15.1  |
| CLDN16  | CLDN16, PCLN1, HOMG3                            | 603959 | ENSG00000113946 | 3q28     |
| CLDN19  | CLDN19, HOMG5                                   | 610036 | ENSG00000164007 | 1p34.2   |
| CNGB3   | CNGB3, ACHM3, ACHM1                             | 605080 | ENSG00000170289 | 8q21.3   |
| COL11A1 | COL11A1, STL2                                   | 120280 | ENSG00000060718 | 1p21.1   |
| COL18A1 | COL18A1, KNO1                                   | 120328 | ENSG00000182871 | 21q22.3  |
| COL2A1  | COL2A1                                          | 120140 | ENSG00000139219 | 12q13.11 |
| COL4A1  | COL4A1, POREN1, HANAC, ICH, BSVD, RATOR         | 120130 | ENSG00000187498 | 13q34    |
| COL4A3  | COL4A3                                          | 120070 | ENSG00000169031 | 2q36.3   |
| COL4A5  | COL4A5, ATS, ASLN                               | 303630 | ENSG00000188153 | Xq22.3   |
| COL5A1  | COL5A1, EDSC                                    | 120215 | ENSG00000130635 | 9q34.3   |
| COL9A2  | COL9A2, EDM2, STL5                              | 120260 | ENSG00000049089 | 1p34.2   |
| COX7B   | COX7B, LSDMCA2                                  | 300885 | ENSG00000131174 | Xq21.1   |
| CRB1    | CRB1, RP12, LCA8                                | 604210 | ENSG00000134376 | 1q31.3   |
| CRYBA2  | CRYBA2, CTRCT42                                 | 600836 | ENSG00000163499 | 2q35     |
| CTCF    | CTCF, MRD21                                     | 604167 | ENSG00000102974 | 16q22.1  |
| DAG1    | DAG1, DAG, MDDGC9, MDDGA9                       | 128239 | ENSG00000173402 | 3p21.31  |
| ELOVL4  | ELOVL4, ADMD, STGD2, STGD3, ISQMR, SCA34        | 605512 | ENSG00000118402 | 6q14.1   |
| EPHA2   | EPHA2, ECK, ARCC2, CTPP1, CTPA, ARCC2, CTRCT6   | 176946 | ENSG00000142627 | 1p36.13  |
| ERBB3   | ERBB3, LCCS2                                    | 190151 | ENSG00000065361 | 12q13.2  |
| ERCC4   | ERCC4, XPF, FANCQ                               | 133520 | ENSG00000175595 | 16p13.12 |
| ERCC6   | ERCC6, CKN2, COFS1, CSB, ARMD5, UVSS1           | 609413 | ENSG00000225830 | 10q11.23 |
| ERCC8   | ERCC8, CKN1, CSA, UVSS2                         | 609412 | ENSG00000049167 | 5q12.1   |
| FAM111A | FAM111A, KIAA1895, KCS2, GCLEB                  | 615292 | ENSG00000166801 | 11q12.1  |
| FBN1    | FBN1, MFS1, WMS2, SSKS, GPHYSD2, ACMICD, ECTOL1 | 134797 | ENSG00000166147 | 15q21.1  |

|        |                                                              |        |                 |              |
|--------|--------------------------------------------------------------|--------|-----------------|--------------|
| FBN2   | FBN2, CCA, EOMD                                              | 612570 | ENSG00000138829 | 5q23.3       |
| FGD1   | FGD1, FGDY, AAS, MRXS16                                      | 300546 | ENSG00000102302 | Xp11.22      |
| FGFR3  | FGFR3, ACH                                                   | 134934 | ENSG00000068078 | 4p16.3       |
| FKBP14 | FKBP14, EDSKMH                                               | 614505 | ENSG00000106080 | 7p14.3       |
| FKRP   | FKRP, MDC1C, LGMD2I, MDDGA5, MDDGB5, MDDGC5                  | 606596 | ENSG00000181027 | 19q13.32     |
| FKTN   | FKTN, FCMD, CMD1X, LGMD2M, MDDGA4, MDDGB4, MDDGC4            | 607440 | ENSG00000106692 | 9q31.2       |
| FOXL2  | FOXL2, BPES, BPES1, PFRK, POF3                               | 605597 | ENSG00000183770 | 3q22.3       |
| GJA1   | GJA1, CX43, ODDD, SDTY3, ODOB, HSS, AVSD3, HLHS1, CMDR, EKVP | 121014 | ENSG00000152661 | 6q22.31      |
| GJC2   | GJC2, GJA12, CX47, PMLDAR, HLD2, SPG44, LMPH1C               | 608803 | ENSG00000198835 | 1q42.13      |
| GNPTAB | GNPTAB, GNPTA                                                | 607840 | ENSG00000111670 | 12q23.2      |
| GNPTG  | GNPTAG                                                       | 607838 | ENSG00000090581 | 16p13.3      |
| GPR179 | GPR179, GPR158L, GPR158L1, CSNB1E                            | 614515 | ENSG00000276469 | 17q12        |
| GRM6   | GRM6, MGLUR6, CSNB1B                                         | 604096 | ENSG00000113262 | 5q35.3       |
| HDAC8  | HDAC8, WTS, MRXS6, CDLS5                                     | 300269 | ENSG00000147099 | Xq13.1       |
| HSPG2  | HSPG2, PLC, SJS, SJA, SJS1                                   | 142461 | ENSG00000142798 | 1p36.12      |
| IFIH1  | IFIH1, MDA5, AGS7, SGMRT1                                    | 606951 | ENSG00000115267 | 2q24.2       |
| IFT122 | IFT122, WDR10, CED1                                          | 606045 | ENSG00000163913 | 3q21.3-q22.1 |
| IRX5   | IRX5, HMMS                                                   | 606195 | ENSG00000176842 | 16q12.2      |
| JAG1   | JAG1, AGS, AHD                                               | 601920 | ENSG00000101384 | 20p12.2      |
| KANSL1 | KANSL1, KIAA1267, MSL1V1, KDVS                               | 612452 | ENSG00000275867 | 17q21.31     |
| KCNH1  | KCNH1, EAG, TMBTS, ZLS1                                      | 603305 | ENSG00000143473 | 1q32.2       |
| KCNV2  | KCNV2, KV11.1, RCD3B                                         | 607604 | ENSG00000168263 | 9p24.2       |
| KDM5C  | KDM5C, JARID1C, SMCX, DXS1272E, XE169, MRXSCJ                | 314690 | ENSG00000126012 | Xp11.22      |
| KERA   | KERA, CNA2                                                   | 603288 | ENSG00000139330 | 12q21.33     |
| KIF11  | KIF11, KNSL1, MCLMR                                          | 148760 | ENSG00000138160 | 10q23.33     |

|         |                                                |        |                 |                     |
|---------|------------------------------------------------|--------|-----------------|---------------------|
| LAMA1   | LAMA1, PTBHS                                   | 150320 | ENSG00000101680 | 18p11.31-<br>p11.23 |
| LRIT3   | LRIT3, FIGLER4, CSNB1F                         | 615004 | ENSG00000183423 | 4q25                |
| LRP2    | LRP2, DBS                                      | 600073 | ENSG00000081479 | 2q31.1              |
| LRPAP1  | LRPAP1, A2MRAP, MYP23                          | 104225 | ENSG00000163956 | 4p16.3              |
| LTBP2   | LTBP2, LTBP3, GLC3D, MSPKA, WMS3               | 602091 | ENSG00000119681 | 14q24.3             |
| MAGEL2  | MAGEL2, NDNL1, SHFYNG                          | 605283 | ENSG00000254585 | 15q11.2             |
| MBD5    | MBD5, KIAA1461, MRD1                           | 611472 | ENSG00000204406 | 2q23.1              |
| MFRP    | MFRP, MCOP5, NNO2                              | 606227 | ENSG00000259159 | 11q23.3             |
| MIR184  | MIR184, MIRN184, KTCNCT, EDICT                 | 613146 | ENSG00000207695 | 15q25.1             |
| MYOC    | MYOC, TIGR, GLC1A, JOAG, GPOA                  | 601652 | ENSG00000034971 | 1q24.3              |
| NBAS    | NBAS, NAG, SOPH, ILFS2                         | 608025 | ENSG00000151779 | 2p24.3              |
| NDN     | NDN                                            | 602117 | ENSG00000182636 | 15q11.2             |
| NDUFB11 | NDUFB11, LSDMCA3                               | 300403 | ENSG00000147123 | Xp11.23             |
| NIPBL   | NIPBL, CDLS1                                   | 608667 | ENSG00000164190 | 5p13.2              |
| NMNAT1  | NMNAT1, NMNAT, PNAT1, LCA9                     | 608700 | ENSG00000173614 | 1p36.22             |
| NOG     | NOG, SYM1, SYNS1                               | 602991 | ENSG00000183691 | 17q22               |
| NSD1    | NSD1, ARA267, STO, SOTOS1                      | 606681 | ENSG00000165671 | 5q35.2-<br>q35.3    |
| NYX     | NYX, CSNB1A, NBM1                              | 300278 | ENSG00000188937 | Xp11.4              |
| OAT     | OAT, GACR                                      | 613349 | ENSG00000065154 | 10q26.13            |
| OCA2    | OCA2, P, PED, D15S12, BOCA, EYCL3, HCL3, SHEP1 | 611409 | ENSG00000277361 | 15q12-q13           |
| OPN1LW  | OPN1LW, RCP, CBP, CBBM                         | 300822 | ENSG00000102076 | Xq28                |
| OPTN    | OPTN, GLC1E, FIP2, HYPL, NRP, ALS12            | 602432 | ENSG00000123240 | 10p13               |
| P3H2    | P3H2, LEPREL1, MCVD                            | 610341 | ENSG00000090530 | 3q28                |
| PCNT    | PCNT, PCNT2, KEN, SCKL4, MOPD2                 | 605925 | ENSG00000160299 | 21q22.3             |
| PIEZO2  | PIEZO2, FAM38B, DA5, DA3, MWKS                 | 613629 | ENSG00000154864 | 18p11.22-<br>p11.21 |

|          |                                                |        |                 |          |
|----------|------------------------------------------------|--------|-----------------|----------|
| PIGT     | PIGT, NDAP, PNH2, MCAHS3                       | 610272 | ENSG00000124155 | 20q13.12 |
| PIK3R1   | PIK3R1, GRB1, AGM7, SHORT, IMD36               | 171833 | ENSG00000145675 | 5q13.1   |
| PLOD1    | PLOD1, LH1, LLH, EDS6                          | 153454 | ENSG00000083444 | 1p36.22  |
| PLOD3    | PLOD3, LH3                                     | 603066 | ENSG00000106397 | 7q22.1   |
| POLR1C   | POLR1C, RPA39, RPA40, RPAC1, RPA5, TCS3, HLD11 | 610060 | ENSG00000171453 | 6p21.1   |
| POLR3B   | POLR3B, RPC2, C128, HLD8                       | 614366 | ENSG00000013503 | 12q23.3  |
| POMGNT1  | POMGNT1, MEB, MDDGA3, MDDGB3, MDDGC3           | 606822 | ENSG00000085998 | 1p34.1   |
| POMT1    | POMT1, MDDGA1, MDDGB1, MDDGC1                  | 607423 | ENSG00000130714 | 9q34.13  |
| POMT2    | POMT2, MDDGA2, MDDGB2, MDDGC2                  | 607439 | ENSG00000009830 | 14q24.3  |
| PQBP1    | PQBP1, NPW38, SHS, MRX55, MRXS3, RENS1, MRXS8  | 300463 | ENSG00000102103 | Xp11.23  |
| PRDM5    | PRDM5, BCS2                                    | 614161 | ENSG00000138738 | 4q27     |
| PRIMPOL  | CCDC111, MYP22                                 | 615421 | ENSG00000164306 | 4q35.1   |
| PRSS56   | PRSS56, MCOP6                                  | 613858 | ENSG00000237412 | 2q37.1   |
| PTEN     | PTEN, MMAC1, GLM2, CWS1                        | 601728 | ENSG00000171862 | 10q23.31 |
| PTPN11   | PTPN11, PTP2C, SHP2, NS1, JMML, METCDS         | 176876 | ENSG00000179295 | 12q24.13 |
| RAB28    | RAB28, CORD18                                  | 612994 | ENSG00000157869 | 4p15.33  |
| RD3      | RD3, LCA12, C1orf36                            | 180040 | ENSG00000198570 | 1q32.3   |
| RP2      | RP2                                            | 300757 | ENSG00000102218 | Xp11.23  |
| RPGR     | RPGR, RP3, CRD, RP15, COD1, CORDX1             | 312610 | ENSG00000156313 | Xp11.4   |
| RS1      | RS1, XLRS1                                     | 300839 | ENSG00000102104 | Xp22.13  |
| SCO2     | SCO2, CEMCOX1, MYP6                            | 604272 | ENSG00000130489 | 22q13.33 |
| SKI      | SKI, SGS                                       | 164780 | ENSG00000157933 | 1p36.33  |
| SLC39A5  | SLC39A5, MYP24                                 | 608730 | ENSG00000139540 | 12q13.3  |
| SLC6A8   | SLC6A8, CRTR, CCDS1                            | 300036 | ENSG00000130821 | Xq28     |
| SLITRK6  | SLITRK6, DFNMYP                                | 609681 | ENSG00000184564 | 13q31.1  |
| SMAD4    | MADH4, DPC4, SMAD4, JIP, MYHRS                 | 600993 | ENSG00000141646 | 18q21.2  |
| SMARCAL1 | SMARCAL1, HARP, SIOD                           | 606622 | ENSG00000138375 | 2q35     |

|          |                                                         |        |                 |                   |
|----------|---------------------------------------------------------|--------|-----------------|-------------------|
| SMS      | SMS, SRS, MRSR                                          | 300105 | ENSG00000102172 | Xp22.11           |
| SOBP     | SOBP, JXC1, MRAMS                                       | 613667 | ENSG00000112320 | 6q21              |
| SRCAP    | SRCAP, SWR1, KIAA0309, FLHS                             | 611421 | ENSG00000080603 | 16p11.2           |
| TBC1D24  | TBC1D24, KIAA1171, FIME, EIEE16, DOORS, DFNB86, DFNA65  | 613577 | ENSG00000162065 | 16p13.3           |
| TBC1D7   | TBC1D7, PIG51, TBC7, MGCPH                              | 612655 | ENSG00000145979 | 6p24.1            |
| TCF4     | TCF4, SEF2, ITF2, PTHS, FECD3                           | 602272 | ENSG00000196628 | 18q21.2           |
| TEAD1    | TEAD1, TCF13, REF1                                      | 189967 | ENSG00000187079 | 11p15.3-<br>p15.2 |
| TFAP2A   | TFAP2A, AP2TF, BOFS                                     | 107580 | ENSG00000137203 | 6p24.3            |
| THOC6    | THOC6, FSAP35, BBIS                                     | 615403 | ENSG00000131652 | 16p13.3           |
| TIMM8A   | TIMM8A, DFN1, DDP, MTS, DDP1                            | 300356 | ENSG00000126953 | Xq22.1            |
| TMEM98   | TMEM98, NNO4                                            | 615949 | ENSG00000006042 | 17q11.2           |
| TRAPPC11 | TRAPPC11, C4orf41, LGMD2S                               | 614138 | ENSG00000168538 | 4q35.1            |
| TRIM37   | TRIM37, MUL, KIAA0898                                   | 605073 | ENSG00000108395 | 17q22             |
| TRPV4    | TRPV4, VROAC, HMSN2C, CMT2C, SPSMA, SSQTL1, SMAL, BCYM3 | 605427 | ENSG00000111199 | 12q24.11          |
| TUB      | TUB, RDOB                                               | 601197 | ENSG00000166402 | 11p15.4           |
| TUBB3    | TUBB3, TUBB4, CFEOM3A, CDCBM1                           | 602661 | ENSG00000258947 | 16q24.3           |
| TULP1    | TULP1, RP14, LCA15                                      | 602280 | ENSG00000112041 | 6p21.31           |
| TYR      | TYR, SHEP3, CMM8, OCA1A, ATN                            | 606933 | ENSG00000077498 | 11q14.3           |
| UBE3A    | UBE3A, ANCR                                             | 601623 | ENSG00000114062 | 15q11.2           |
| UBE3B    | UBE3B, BPIDS, KOS                                       | 608047 | ENSG00000151148 | 12q24.11          |
| VCAN     | VCAN, CSPG2, WGN, WGN1, ERVR                            | 118661 | ENSG00000038427 | 5q14.2-<br>q14.3  |
| VPS13B   | VPS13B, KIAA0532, COH1                                  | 607817 | ENSG00000132549 | 8q22.2            |
| VSX1     | VSX1, RINX, PPCD1, PPD, KTCN1, CAASDS                   | 605020 | ENSG00000100987 | 20p11.21          |
| WDR19    | WDR19, SRTD5, ATD5, NPHP13, CED4                        | 608151 | ENSG00000157796 | 4p14              |

|        |                        |        |                 |         |
|--------|------------------------|--------|-----------------|---------|
| ZNF408 | ZNF408, EVR6, RP72     | 616454 | ENSG00000175213 | 11p11.2 |
| ZNF469 | ZNF469, KIAA1858, BCS1 | 612078 | ENSG00000225614 | 16q24.2 |
| ZNF644 | ZNF644, MYP21          | 614159 | ENSG00000122482 | 1p22.2  |
| ZSWIM6 | ZSWIM6, KIAA1577, AFND | 615951 | ENSG00000130449 | 5q12.1  |
